# Supplementary material for: Synthesis and rheological investigations of gum-ghatti-cl-poly(NIPA-co-AA)-graphene oxide based hydrogels
Source: Royal Society of Chemistry journal article supplement (doi:10.1039/d3ma00092c), 2023-01-01
Supplement: d3ma00092c1.pdf [file d3ma00092c1.pdf]

## Synthesis and Rheological Investigations of Gum-ghatti-*cl*-poly(NIPA-co-AA)-Graphene oxide based Hydrogels

Pragnesh N Dave<sup>1\*</sup>, Pradip M. Macwan<sup>2</sup> and Bhagvan Kamaliya<sup>1</sup>

<sup>1</sup> Department of Chemistry, Sardar Patel University, Vallabh Vidyangar-388 120, Gujarat, India

<sup>2</sup> B. N. Patel Institute of Paramedical & Science (Science Division), Sardar Patel Education Trust, Bhalej Road, Anand - 388001, Gujarat, India.

\* Corresponding author: pragnesh7@yahoo.com

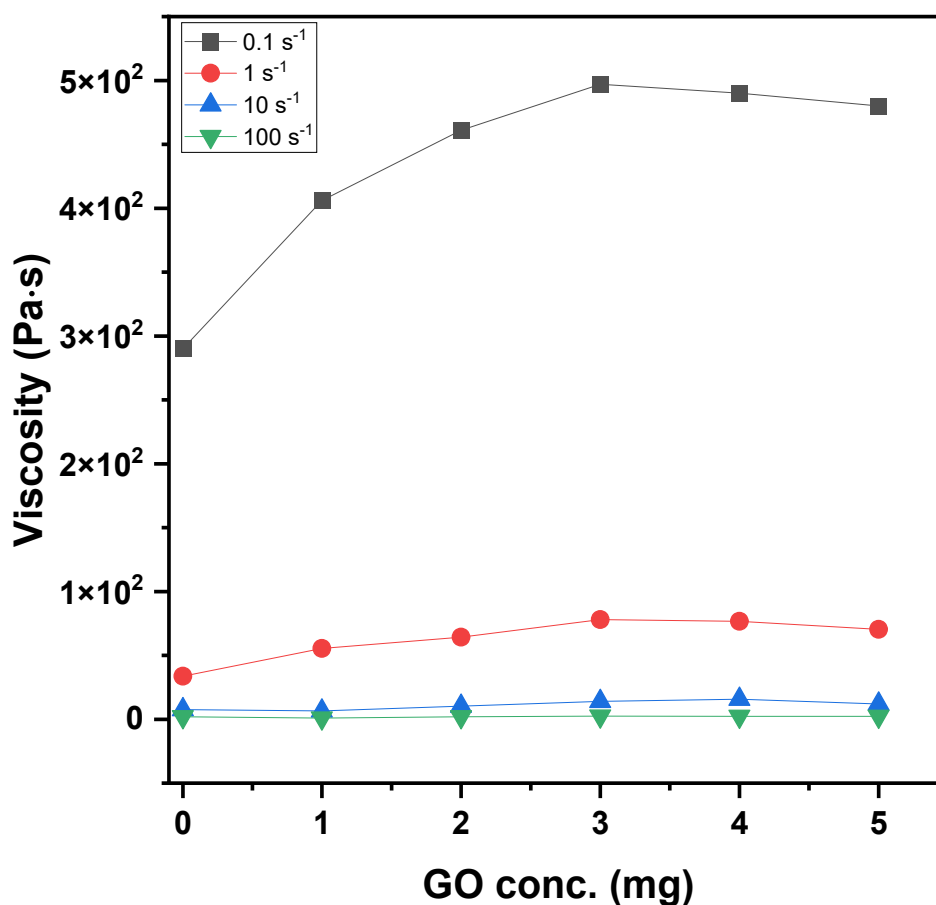

**Figure S1** the effect of graphene oxide concentration (■) 0.1 s<sup>-1</sup>, (●) 1 s<sup>-1</sup>, (▲) 10 s<sup>-1</sup> and (▼) 100 s<sup>-1</sup> on the viscosity of GNAGO hydrogels at room temperature.

**Table S1** Effect of graphene oxide concentration on the viscosity of GNAGO hydrogels at different shear rates. (mean  $\pm$  SD)

| GO conc.<br>(mg) | Shear rate (s <sup>-1</sup> ) |                |                |                 |
|------------------|-------------------------------|----------------|----------------|-----------------|
|                  | 0.1                           | 1              | 10             | 100             |
| 0                | 290 $\pm$ 5.2                 | 33.7 $\pm$ 2.1 | 7.53 $\pm$ 1.7 | 1.88 $\pm$ 0.3  |
| 1                | 406 $\pm$ 8.4                 | 55.5 $\pm$ 3.2 | 6.47 $\pm$ 1.2 | 0.862 $\pm$ 0.2 |
| 2                | 461 $\pm$ 9.7                 | 64.2 $\pm$ 4.4 | 10.3 $\pm$ 1.4 | 1.9 $\pm$ 0.4   |
| 3                | 497 $\pm$ 7.4                 | 78.0 $\pm$ 2.4 | 14.0 $\pm$ 1.1 | 2.53 $\pm$ 0.5  |
| 4                | 490 $\pm$ 9.8                 | 76.6 $\pm$ 3.4 | 15.7 $\pm$ 1.5 | 2.21 $\pm$ 0.7  |
| 5                | 480 $\pm$ 8.0                 | 70.4 $\pm$ 2.8 | 11.9 $\pm$ 2.1 | 2.21 $\pm$ 0.4  |

**Table S2 The values of storage modulus, loss modulus, complex viscosity and damping factor with angular frequency at 0.1, 1, 10 and 100 (rad/s) (mean  $\pm$  SD)**

| Sample id      | Angular Frequency (rad/s) |           |              |            |           |           |              |           |           |            |              |          |           |           |              |            |
|----------------|---------------------------|-----------|--------------|------------|-----------|-----------|--------------|-----------|-----------|------------|--------------|----------|-----------|-----------|--------------|------------|
|                | 0.1                       |           |              |            | 1         |           |              |           | 10        |            |              |          | 100       |           |              |            |
|                | G'                        | G''       | tan $\delta$ | $\eta^*$   | G'        | G''       | tan $\delta$ | $\eta^*$  | G'        | G''        | tan $\delta$ | $\eta^*$ | G'        | G''       | tan $\delta$ | $\eta^*$   |
| <b>GNAGO-0</b> | 102                       | 11.1      | 0.108        | 1030       | 88        | 9.78      | 0.111        | 88.5      | 98.8      | 13.6       | 0.137        | 9.98     | 63.9      | 18        | 0.281        | 0.663      |
|                | $\pm$                     | $\pm 0.3$ | $\pm$        | $\pm 11.4$ | $\pm 1.3$ | $\pm 0.1$ | $\pm$        | $\pm 4.2$ | $\pm 2.1$ | $\pm 0.5$  | $\pm$        | $\pm$    | $\pm 1.5$ | $\pm 0.8$ | $\pm 0.03$   | $\pm 0.05$ |
|                | 2.7                       |           | 0.002        |            |           |           | 0.004        |           |           |            | 0.003        | 0.03     |           |           |              |            |
| <b>GNAGO-1</b> | 142                       | 14.4      | 0.101        | 1430       | 108       | 10.3      | 0.095        | 108       | 118       | 14.3       | 0.121        | 11.9     | 111       | 21.3      | 0.191        | 1.13       |
|                | $\pm$                     | $\pm 0.2$ | $\pm 0.03$   | $\pm 16.2$ | $\pm 2.3$ | $\pm$     | $\pm$        | $\pm 5.1$ | $\pm 3.0$ | $\pm 0.2$  | 0.001        | $\pm$    | $\pm 2.3$ | $\pm 0.2$ | $\pm 0.01$   | $\pm 0.06$ |
|                | 5.1                       |           |              |            |           | 0.17      | 0.002        |           |           |            |              | 0.035    |           |           |              |            |
| <b>GNAGO-2</b> | 150                       | 18.5      | 0.123        | 1510       | 126       | 10.2      | 0.080        | 126       | 135       | 13.17      | 0.097        | 13.8     | 163       | 58        | 0.335        | 1.78       |
|                | $\pm$                     | $\pm$     | $\pm$        | $\pm 20$   | $\pm 2.7$ | $\pm$     | $\pm 0.01$   | $\pm 3.2$ | $\pm 3.1$ | $\pm 0.4$  | 0.002        | $\pm$    | $\pm 3.5$ | $\pm 0.5$ | $\pm 0.05$   | $\pm 0.03$ |
|                | 4.7                       | 0.52      | 0.006        |            |           | 0.21      |              |           |           |            |              | 0.04     |           |           |              |            |
| <b>GNAGO-3</b> | 176                       | 19.3      | 0.109        | 1770       | 168       | 14.4      | 0.085        | 169       | 186       | 19.9       | 0.106        | 18.7     | 216       | 67        | 0.310        | 2.17       |
|                | $\pm$                     | $\pm$     | $\pm$        | $\pm 12.3$ | $\pm$     | $\pm$     | $\pm$        | $\pm 2.2$ | $\pm 1.1$ | $\pm 0.11$ | 0.001        | $\pm$    | $\pm 4.0$ | $\pm$     | $\pm$        | $\pm 0.02$ |
|                | 7.3                       | 0.33      | 0.0011       |            | 1.11      | 0.11      | 0.003        |           |           |            |              | 0.02     |           | 0.11      | 0.011        |            |
| <b>GNAGO-4</b> | 158                       | 18.2      | 0.115        | 1580       | 158       | 16.9      | 0.106        | 163       | 178       | 21.8       | 0.122        | 18.8     | 166       | 3.69      | 0.022        | 1.88       |
|                | $\pm$                     | $\pm 0.9$ | $\pm$        | $\pm 15.2$ | $\pm 3.1$ | $\pm$     | $\pm$        | $\pm 7.5$ | $\pm 4.0$ | $\pm 0.7$  | 0.004        | $\pm$    | $\pm 3.0$ | $\pm 0.3$ | $\pm$        | $\pm 0.04$ |
|                | 4.0                       |           | 0.002        |            |           | 0.34      | 0.004        |           |           |            |              | 0.05     |           |           | 0.001        |            |
| <b>GNAGO-5</b> | 157                       | 21        | 0.133        | 1600       | 162       | 20        | 0.123        | 158       | 186       | 27.1       | 0.145        | 17.9     | 188       | 4.48      | 0.023        | 1.66       |
|                | $\pm$                     | $\pm 0.5$ | $\pm 0.04$   | $\pm 26.2$ | $\pm 3.3$ | $\pm$     | $\pm$        | $\pm 5.2$ | $\pm 3.5$ | $\pm 0.33$ | 0.003        | $\pm$    | $\pm 0.5$ | $\pm$     | $\pm$        | $\pm 0.03$ |
|                | 3.7                       |           |              |            |           | 0.27      | 0.008        |           |           |            |              | 0.043    |           | 0.11      | 0.002        |            |

**Table S3 Storage and loss moduli values of GNAGO-0 to GNAGO-5 at the temperatures 40°C and 60 °C for heating. (mean ± SD)**

| Hydrogel Code  | Temperature 40 °C |            | Temperature 60 °C |            |
|----------------|-------------------|------------|-------------------|------------|
|                | G'                | G''        | G'                | G''        |
| <b>GNAGO-0</b> | 67.8 ± 2.2        | 19.1 ± 1.0 | 1620 ± 12.9       | 1020 ± 9.2 |
| <b>GNAGO-1</b> | 97.3 ± 4.1        | 15.6 ± 0.9 | 113 ± 4.2         | 15.9 ± 1.2 |
| <b>GNAGO-2</b> | 81.3 ± 3.5        | 12 ± 0.8   | 180 ± 5.2         | 73.7 ± 2.2 |
| <b>GNAGO-3</b> | 157 ± 3.2         | 21.2 ± 0.5 | 629 ± 2.2         | 269 ± 3.5  |
| <b>GNAGO-4</b> | 40.4 ± 1.2        | 6.11 ± 0.8 | 138 ± 1.2         | 35.4 ± 2.0 |
| <b>GNAGO-5</b> | 40.8 ± 2.2        | 3.03 ± 0.2 | 48 ± 2.0          | 4.17 ± 0.2 |

**Table S4. The value of elastic and viscous moduli and tanδ at 10, 25 and 99.8 % of strain of GNAGO-0 to GNAGO-5 (mean ± SD)**

| Hydrogel Code  | 1 % strain |      |       | 10 % strain |      |       | 25 % strain |      |       | 99.8 % strain |      |       |
|----------------|------------|------|-------|-------------|------|-------|-------------|------|-------|---------------|------|-------|
|                | G'         | G''  | tanδ  | G'          | G''  | tanδ  | G'          | G''  | tanδ  | G'            | G''  | tanδ  |
| <b>GNAGO-0</b> | 100        | 12.1 | 0.136 | 96.9        | 13   | 0.135 | 90.3        | 14.1 | 0.156 | 65.4          | 16.8 | 0.258 |
|                | ±          | ±    | ±     | ±           | ±    | ±     | ±           | ±    | ±     | ±             | ±    | ±     |
|                | 4.2        | 0.4  | 0.002 | 0.8         | 0.2  | 0.002 | 1.0         | 0.8  | 0.004 | 0.7           | 0.2  | 0.28  |
| <b>GNAGO-1</b> | 105        | 12.2 | 0.125 | 104         | 13.2 | 0.128 | 96.4        | 14.5 | 0.151 | 71.3          | 17.1 | 0.24  |
|                | ±          | ±    | ±     | ±           | ±    | ±     | ±           | ±    | ±     | ±             | ±    | ±     |
|                | 4.0        | 0.3  | 0.001 | 1.2         | 0.7  | 0.004 | 1.2         | 1.1  | 0.002 | 1.1           | 0.8  | 0.02  |
| <b>GNAGO-2</b> | 131        | 11.6 | 0.103 | 128         | 13   | 0.101 | 122         | 13.7 | 0.112 | 101           | 16.3 | 0.161 |
|                | ±          | ±    | ±     | ±           | ±    | ±     | ±           | ±    | ±     | ±             | ±    | ±     |
|                | 3.8        | 0.22 | 0.003 | 1.9         | 0.4  | 0.003 | 1.4         | 0.5  | 0.003 | 1.29          | 0.5  | 0.01  |
| <b>GNAGO-3</b> | 198        | 25.6 | 0.129 | 193         | 27.2 | 0.141 | 179         | 30.4 | 0.17  | 116           | 38.9 | 0.334 |
|                | ±          | ±    | ±     | ±           | ±    | ±     | ±           | ±    | ±     | ±             | ±    | ±     |
|                | 2.2        | 0.2  | 0.001 | 2.0         | 0.2  | 0.002 | 1.1         | 0.9  | 0.002 | 1.4           | 0.52 | 0.02  |
| <b>GNAGO-4</b> | 196        | 21.3 | 0.1   | 187         | 23.3 | 0.124 | 170         | 26.9 | 0.159 | 101           | 31.9 | 0.316 |
|                | ±          | ±    | ±     | ±           | ±    | ±     | ±           | ±    | ±     | ±             | ±    | ±     |
|                | 3.0        | 1.2  | 0.003 | 3.2         | 0.9  | 0.003 | 1.33        | 0.82 | 0.004 | 2.5           | 0.7  | 0.06  |
| <b>GNAGO-5</b> | 188        | 21.2 | 0.114 | 177         | 25.1 | 0.142 | 157         | 29.8 | 0.19  | 104           | 39   | 0.376 |
|                | ±          | ±    | ±     | ±           | ±    | ±     | ±           | ±    | ±     | ±             | ±    | ±     |
|                | 4.7        | 0.9  | 0.002 | 2.7         | 1.2  | 0.008 | 1.27        | 1.1  | 0.003 | 3.2           | 0.82 | 0.07  |

**Table S5 The value of shear stress (pa) at 0.1, 10, 25.1 and 99.8 % of strain of GNAGO-0-GNAGO-5 (mean  $\pm$  SD)**

| Sample code    | 0.1 % strain          | 1 % strain         | 10 % strain       | 25.1 % strain     | 99.8 % strain     |
|----------------|-----------------------|--------------------|-------------------|-------------------|-------------------|
| <b>GNAGO-0</b> | 0.0971<br>$\pm$ 0.002 | 1<br>$\pm$ 0.04    | 9.76<br>$\pm$ 0.5 | 22.9<br>$\pm$ 0.2 | 67.2<br>$\pm$ 1.4 |
| <b>GNAGO-1</b> | 0.103<br>$\pm$ 0.009  | 1.06<br>$\pm$ 0.02 | 10.4<br>$\pm$ 0.8 | 24.4<br>$\pm$ 1.2 | 73<br>$\pm$ 1.7   |
| <b>GNAGO-2</b> | 0.131<br>$\pm$ 0.005  | 1.31<br>$\pm$ 0.03 | 12.9<br>$\pm$ 0.2 | 30.7<br>$\pm$ 1.1 | 102<br>$\pm$ 1.3  |
| <b>GNAGO-3</b> | 0.198<br>$\pm$ 0.002  | 1.99<br>$\pm$ 0.01 | 19.4<br>$\pm$ 0.1 | 45.4<br>$\pm$ 0.6 | 122<br>$\pm$ 1.0  |
| <b>GNAGO-4</b> | 0.192<br>$\pm$ 0.007  | 1.97<br>$\pm$ 0.04 | 18.9<br>$\pm$ 0.4 | 43.2<br>$\pm$ 1.6 | 106<br>$\pm$ 1.2  |
| <b>GNAGO-5</b> | 0.218<br>$\pm$ 0.003  | 1.89<br>$\pm$ 0.01 | 17.8<br>$\pm$ 0.3 | 40<br>$\pm$ 1.3   | 110<br>$\pm$ 1.8  |

### FT-IR analysis

The FT-IR spectra of GG, GO, GG-*g*-*P*(NIPAM-*co*-AA) (GNAGO-0) and GG-*g*-*P*(NIPAM-*co*-AA) (GNAGO-3) is shown in the Fig.1. The FT-IR spectra of GG confirmed about feature functional groups presence in GG. The bands at 3340  $\text{cm}^{-1}$  (broad peak) and 2934  $\text{cm}^{-1}$  corresponded to stretching vibration of O-H and C-H respectively<sup>1,2</sup>. The band visualized at 1004  $\text{cm}^{-1}$  ascribed of strong vibration of C-O and band at 541  $\text{cm}^{-1}$  (low intense) assigned to bending vibration of C-O or O-H functionality<sup>1,3</sup>. The strong band found at 1710  $\text{cm}^{-1}$  revealed of stretching vibration of C=O group of carboxylic acid group of AA present in GG-*g*-*P*(NIPAM-*co*-AA)(GNAGO-0)<sup>4</sup>. The stretching vibration of N-H of amide functional group of PNIPAM attributed at 1600  $\text{cm}^{-1}$  (low intense band)<sup>4-6</sup>. The band at 3750  $\text{cm}^{-1}$  can be assigned to stretching vibration of hydroxyl functional group of carboxylic acid of AA. The FT-IR spectra of GO showed that required functionality found in the GO<sup>7</sup>. The FT-IR spectra of GG-*g*-*P*(NIPAM-*co*-AA) indicated that after loading of GO did not alter the spectra of GG-*g*-

*P(NIPAM-co-AA)*. The special bands of GO did not evaluate in the GG-*g*-Poly (*NIPAM-co-AA*) which is the signing of homogeneous dispersion of GO over to GG-*g*-*P(NIPAM-co-AA)*.

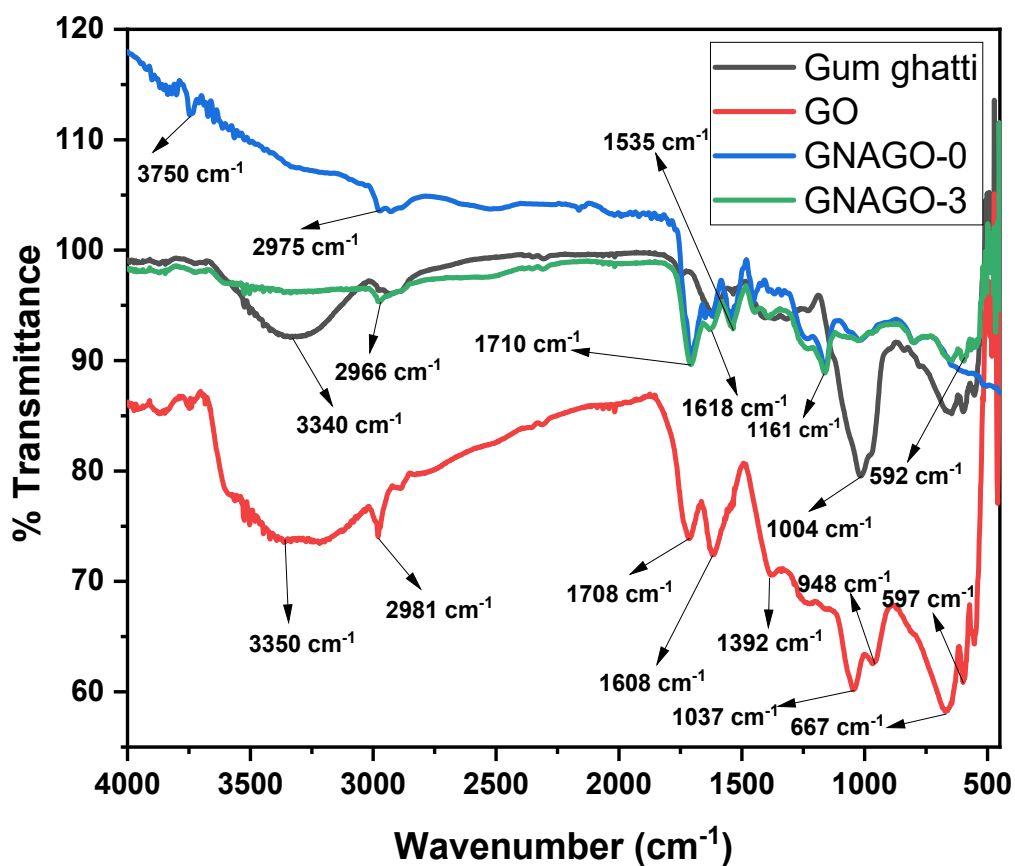

Figure. S2 FT-IR of GG, GO, GNAGO-0 and GNAGO-3

### SEM images

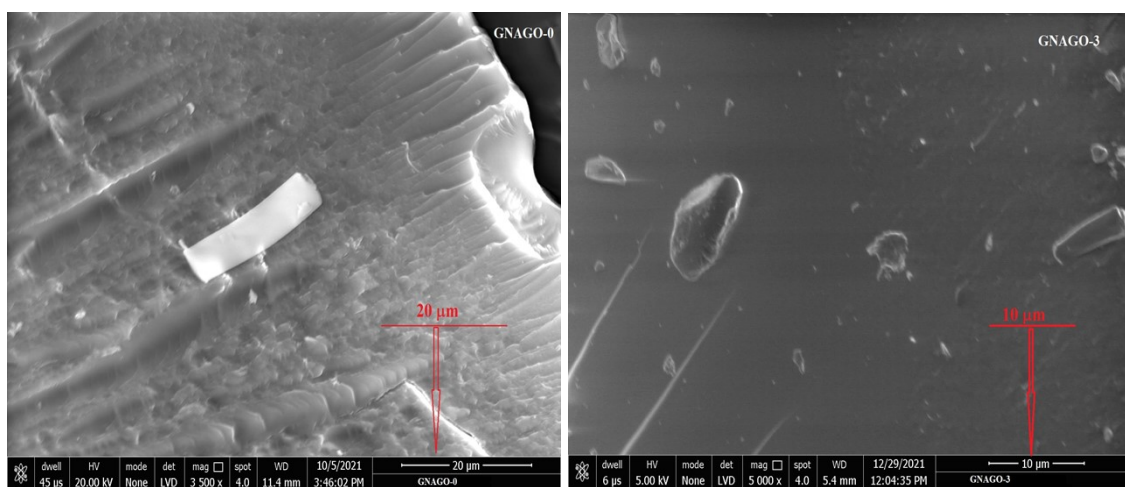

Figure. S3 SEM images of GNAGO-0 and GNAGO-3

Reference:

- 1 V. Puri, A. Sharma, P. Kumar, I. Singh and K. Huanbutta, *ACS Omega*, 2021, **6**, 15844–15854.
- 2 B. S. Kaith, K. Sharma, V. Kumar, S. Kalia and H. C. Swart, *Synth Met*, 2014, **187**, 61–67.
- 3 K. Sharma, V. Kumar, B. S. Kaith, S. Som, V. Kumar, A. Pandey, S. Kalia and H. C. Swart, *Ind Eng Chem Res*, 2015, **54**, 1982–1991.
- 4 T. Ma, X. Li, D. Zhao, G. Qiu, X. Shi and X. Lu, *Colloid Polym Sci*, 2016, **294**, 1251–1257.
- 5 M. Zhang, Y. Li, Q. Yang, L. Huang, L. Chen, Y. Ni and H. Xiao, *Carbohydr Polym*, 2018, **195**, 495–504.
- 6 Y. Park, M. Hwang, M. Kim, E. Park, I. Noda and Y. M. Jung, *Spectrochim Acta A Mol Biomol Spectrosc*, , DOI:10.1016/j.saa.2021.119525.
- 7 Z. Çiplak, N. Yildiz and A. Çalimli, *Fullerenes Nanotubes and Carbon Nanostructures*, 2015, **23**, 361–370.
